# Supplementary material
Source: publisher figshare collection journal article supplement (https://acs.figshare.com/ndownloader/files/11109284)
Supplement: Supplementary file 1 [file 11109284]

# Electroresponsive Homogeneous Polyelectrolyte Complex Hydrogels

## from Naturally Derived Polysaccharides

Qingye Liu,<sup>†,‡</sup> Ziye Dong,<sup>‡</sup> Zhenya Ding,<sup>‡</sup> Zhonglue Hu,<sup>§</sup>  
Dan Yu,<sup>||</sup> Yang Hu,<sup>⊥</sup> Nouredine Abidi,<sup>⊥</sup> and Wei Li<sup>\*,‡</sup>

<sup>†</sup>School of Chemical Engineering and Technology, North University of China, NO. 3 Xueyuan Road, Jiancaoping District, Taiyuan 030051, China

<sup>‡</sup>Department of Chemical Engineering, Texas Tech University, 6th Street and Canton Ave, P. O. Box 43121, Lubbock, Texas 79409, United States

<sup>§</sup>Department of Mechanical Engineering, Texas Tech University, 805 Boston Ave, ME South 201, Lubbock, Texas 79409, United States

<sup>||</sup>Department of Critical Care Medicine, People's Hospital of Zhengzhou University, No. 7 Weiwu Road, Jinshui District, Zhengzhou 450003, United States

<sup>⊥</sup>Fiber and Biopolymer Research Institute, Department of Plant and Soil Science, Texas tech University, 1001 East Loop 289, Mail Stop 45019, Lubbock, Texas 79409, United States

[\*] To whom correspondence and reprint requests should be addressed.  
E-mail: wei.li@ttu.edu

## Contents of Supporting Information

|                                                                                                                                                                                                                                              |    |
|----------------------------------------------------------------------------------------------------------------------------------------------------------------------------------------------------------------------------------------------|----|
| <b>Figure. S1.</b> Swelling ratios of the original CHI/CMC polyelectrolyte hydrogels obtained from 70% ethanol solution (Egels) and deionized water (Wgels).                                                                                 | S3 |
| <b>Figure. S2.</b> Time-dependence of bending angles for the hydrogel strips with different CHI/CMC weight ratios in 0.1M NaCl solution at the dc voltage of 18 V.                                                                           | S4 |
| <b>Figure. S3.</b> SEM image of cross-sectional structures of CHI/CMC hydrogel strip under the reversible dc electrical stimulus in 0.1M NaCl solution for 20 min. The existed NaCl crystals in the hydrogel matrix were indicated by arrow. | S5 |
| <b>Figure. S4.</b> ATR-FTIR spectra of CHI/CMC polyelectrolyte hydrogel with different weight ratios.                                                                                                                                        | S6 |
| <b>Figure. S5.</b> Representative loading-unloading compression curves (6 runs) of Egel with 30% maximum strain.                                                                                                                             | S7 |
| <b>Figure. S6.</b> Reversible bending responses of CHI/CMC (3:2) polyelectrolyte hydrogel strip in 70% v/v ethanol aqueous solution with the NaCl concentration of 0.1 M at the dc voltage of 18 V.                                          | S8 |
| <p>Number of Pages: 8</p> <p>Number of Figures: 6</p>                                                                                                                                                                                        |    |

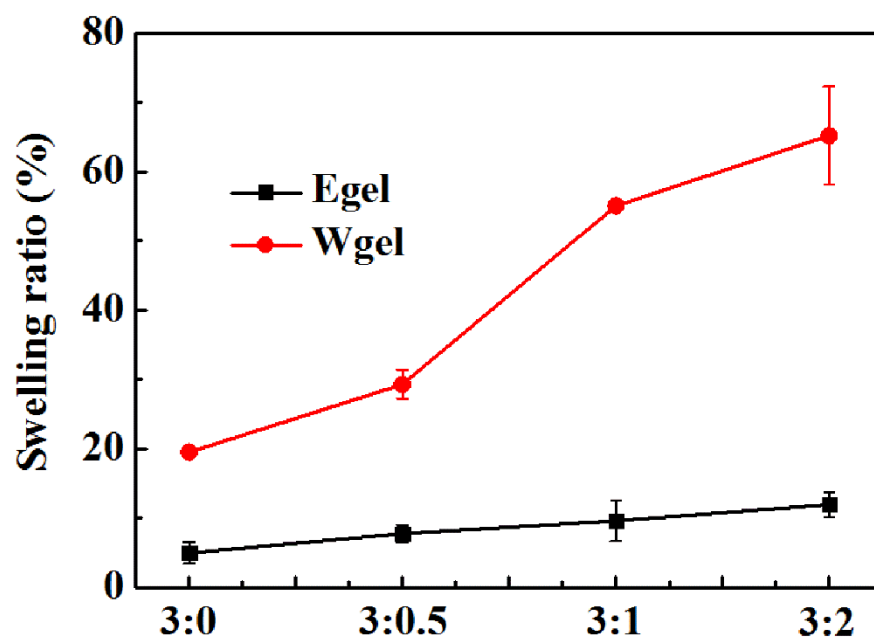

**Figure S1.** Swelling ratios of the original CHI/CMC polyelectrolyte hydrogels obtained from 70% ethanol solution (Egels) and deionized water (Wgels).

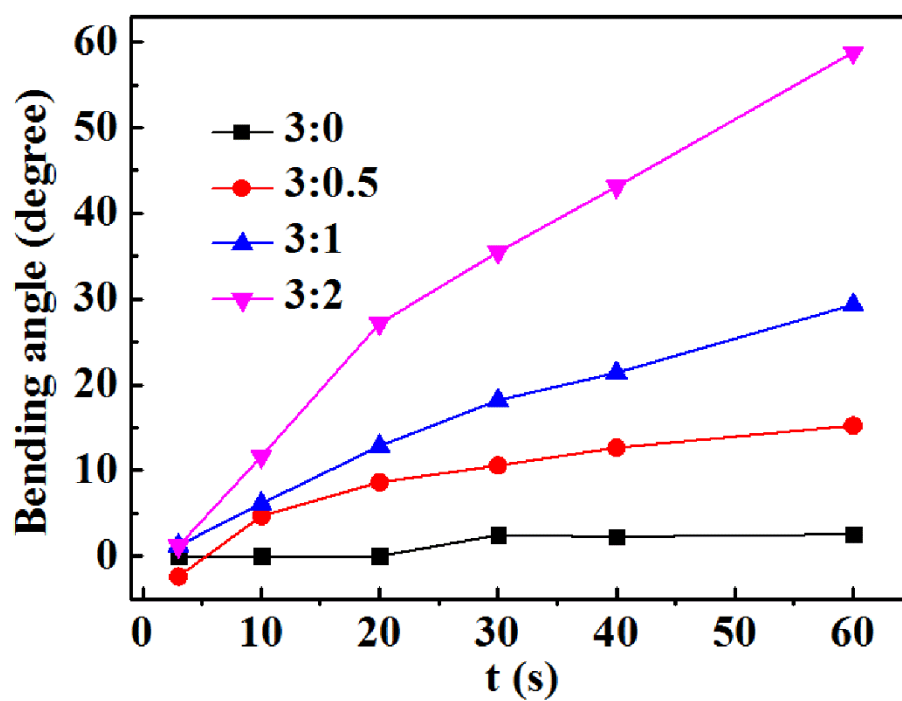

**Figure S2.** Time-dependence of bending angles for the hydrogel strips with different CHI/CMC weight ratios in 0.1M NaCl solution at the dc voltage of 18 V.

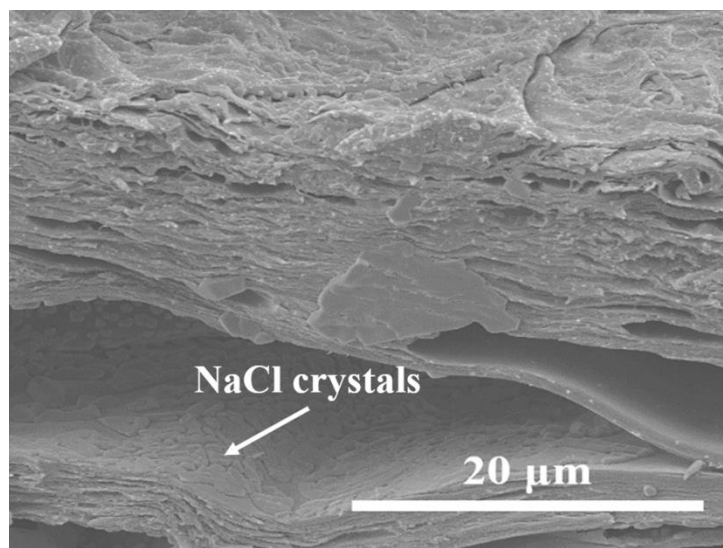

**Figure S3.** SEM image of cross-sectional structures of CHI/CMC hydrogel strip under the reversible dc electrical stimulus in 0.1M NaCl solution for 20 min. The existed NaCl crystals in the hydrogel matrix were indicated by arrow.

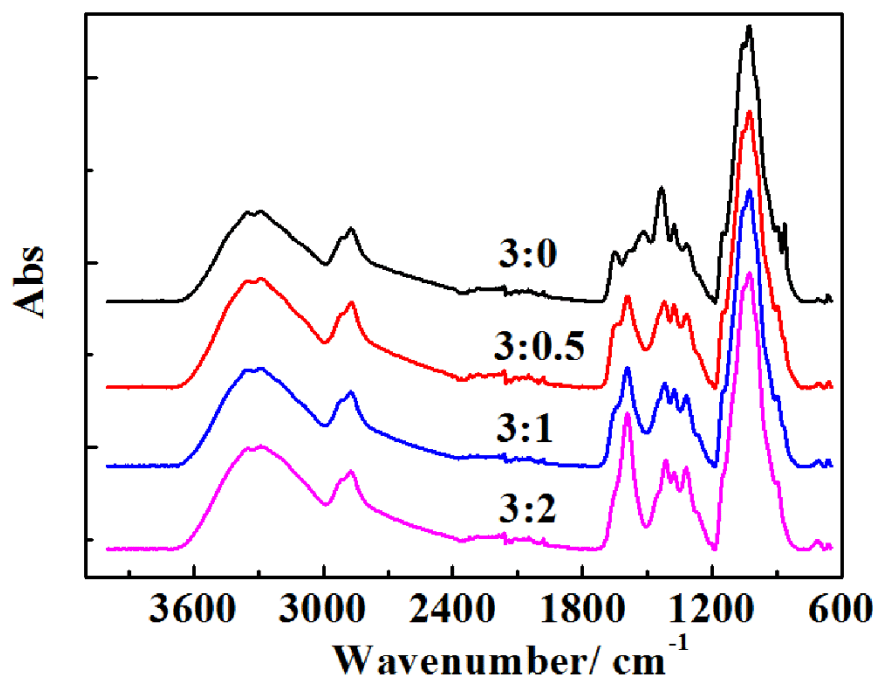

**Figure S4.** ATR-FTIR spectra of CHI/CMC polyelectrolyte hydrogel with different weight ratios.

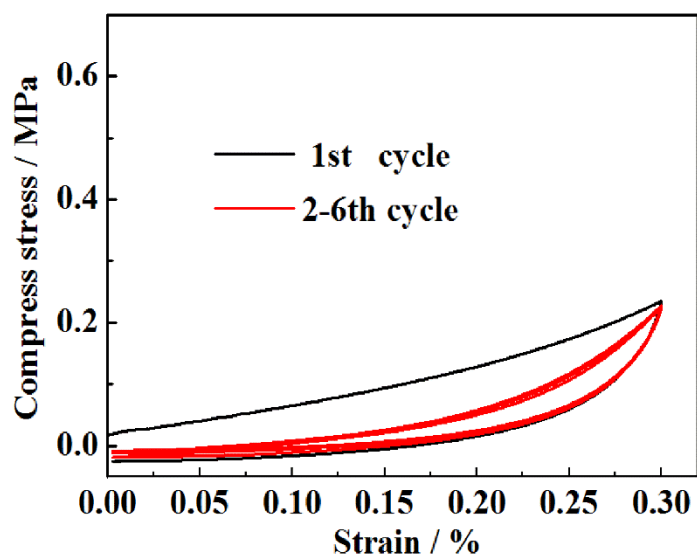

**Figure S5.** Representative loading-unloading compression curves (6 runs) of Egel with 30% maximum strain.

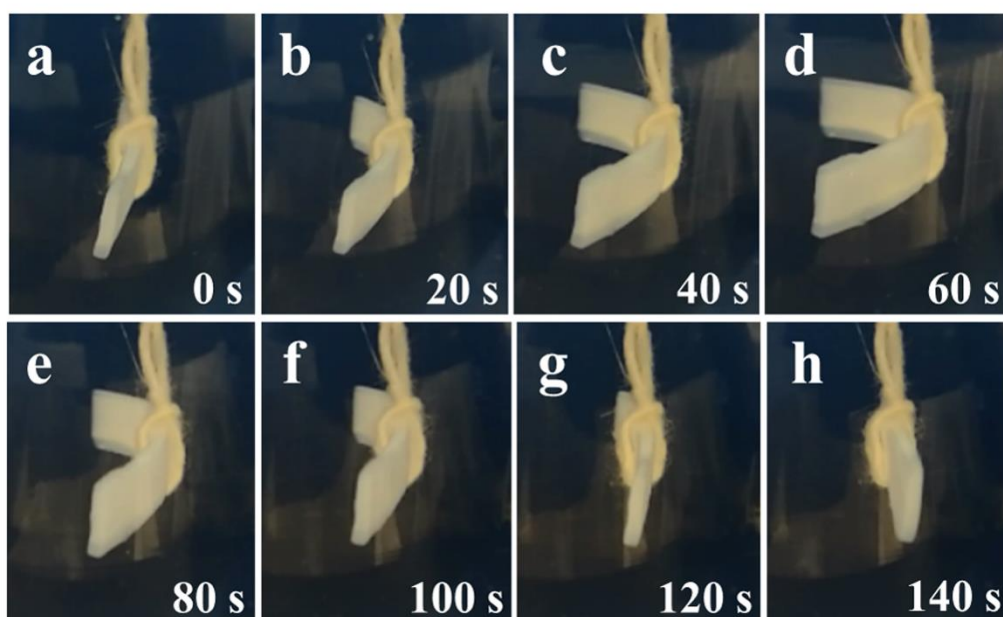

**Figure S6.** Reversible bending behaviors of CHI/CMC (3:2) polyelectrolyte hydrogel strip in 70% v/v ethanol aqueous solution with the NaCl concentration of 0.1 M at the dc voltage of 18 V.
